# Supplementary material
Source: Springer Nature journal article supplement (https://www.springermedizin.de/resource/supplementary/12884_2014_1083_MOESM3_ESM.pdf/9458834)

# Intelligent Structured Intermittent Auscultation (ISIA) Informed Decision-Making Framework

## Ongoing FHR monitoring in Active Labour

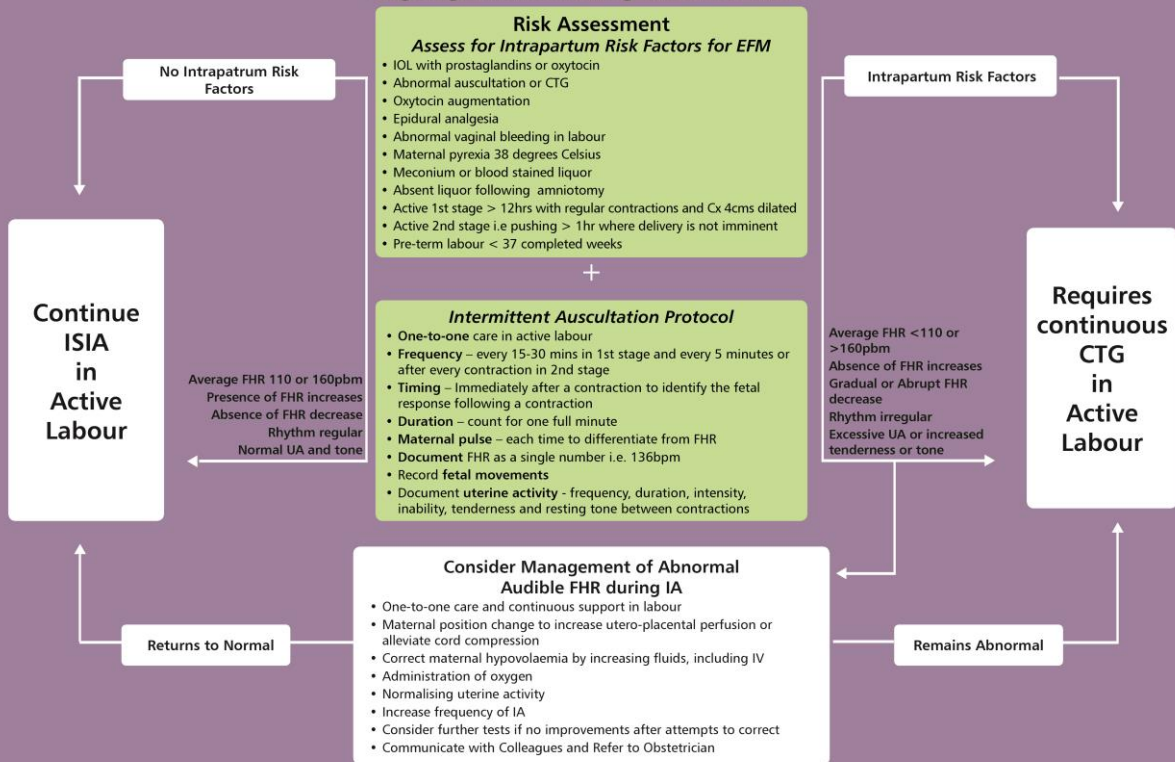

Supplement: MOESM3 [file 9458834]
